# Supplementary material for: Genetic dissection of heterosis using epistatic association mapping in a partial NCII mating design
Source: PubMed Central journal article supplement (PMC4683666; doi:10.1038/srep18376), 2015-12-17
Supplement: srep18376-s1.pdf [file srep18376-s1.pdf]

# **Genetic dissection of heterosis using epistatic association mapping in a partial NCII mating design**

Jia Wen<sup>1,2</sup>, Xinwang Zhao<sup>1</sup>, Guorong Wu<sup>2</sup>, Dan Xiang<sup>2</sup>, Qing Liu<sup>2</sup>, Su-Hong Bu<sup>2</sup>, Can Yi<sup>2</sup>,  
Qijian Song<sup>3</sup>, Jim M. Dunwell<sup>4</sup>, Jinxing Tu<sup>1</sup>, Tianzhen Zhang<sup>2</sup> & Yuan-Ming Zhang<sup>1</sup>

**Table S1** | Simulated parameters in all the simulation experiments

| Simulation study | Case | NCII design |          |                | Genome length (cM) | Marker Density (cM) | QTL       | Effect type of QTL | Heritability (%) | Position(cM)       | Sample for analysis |                    |                    |                    |
|------------------|------|-------------|----------|----------------|--------------------|---------------------|-----------|--------------------|------------------|--------------------|---------------------|--------------------|--------------------|--------------------|
|                  |      | maternal    | paternal | F <sub>1</sub> |                    |                     |           |                    |                  |                    | Trait phenotype     | GCA                | SCA                | MPH                |
| Part I           | 1    | 120         | 120      | 240            | 100                | Equal, 5            | 1         | <i>a</i>           | 5                | 25                 | 240 F <sub>1</sub>  | 240 parents        | 240 F <sub>1</sub> | 240 F <sub>1</sub> |
|                  |      |             |          |                |                    |                     | 2         | <i>a</i>           | 10               | 75                 |                     |                    |                    |                    |
|                  |      |             |          |                |                    |                     | 3         | <i>a</i>           | 5                | 135                |                     |                    |                    |                    |
|                  |      |             |          |                |                    |                     | 4         | <i>a</i>           | 15               | 175                |                     |                    |                    |                    |
|                  |      |             |          |                |                    |                     | 5         | <i>a</i>           | 10               | 220                |                     |                    |                    |                    |
|                  |      |             |          |                |                    |                     | 6         | <i>a</i>           | 15               | 270                |                     |                    |                    |                    |
|                  | 2    | 120         | 120      | 240            | 100                | Equal, 5            | 1         | <i>d</i>           | 5                | 25                 | 240 F <sub>1</sub>  | 240 parents        | 240 F <sub>1</sub> | 240 F <sub>1</sub> |
|                  |      |             |          |                |                    |                     | 2         | <i>d</i>           | 10               | 75                 |                     |                    |                    |                    |
|                  |      |             |          |                |                    |                     | 3         | <i>d</i>           | 5                | 135                |                     |                    |                    |                    |
|                  |      |             |          |                |                    |                     | 4         | <i>d</i>           | 15               | 175                |                     |                    |                    |                    |
|                  |      |             |          |                |                    |                     | 5         | <i>d</i>           | 10               | 220                |                     |                    |                    |                    |
|                  |      |             |          |                |                    |                     | 6         | <i>d</i>           | 15               | 270                |                     |                    |                    |                    |
|                  | 3    | 120         | 120      | 240            | 100                | Equal, 5            | 1         | <i>aa</i>          | 5                | 20 × 60            | 240 F <sub>1</sub>  | 240 parents        | 240 F <sub>1</sub> | 240 F <sub>1</sub> |
|                  |      |             |          |                |                    |                     | 2         | <i>aa</i>          | 10               | 90 × 125           |                     |                    |                    |                    |
|                  |      |             |          |                |                    |                     | 3         | <i>aa</i>          | 5                | 155 × 205          |                     |                    |                    |                    |
|                  |      |             |          |                |                    |                     | 4         | <i>aa</i>          | 15               | 180 × 235          |                     |                    |                    |                    |
|                  |      |             |          |                |                    |                     | 5         | <i>aa</i>          | 10               | 40 × 275           |                     |                    |                    |                    |
|                  |      |             |          |                |                    |                     | 6         | <i>aa</i>          | 15               | 75 × 220           |                     |                    |                    |                    |
|                  | 4    | 120         | 120      | 240            | 100                | Equal, 5            | 1         | <i>ad</i>          | 5                | 20 × 60            | 240 F <sub>1</sub>  | 240 parents        | 240 F <sub>1</sub> | 240 F <sub>1</sub> |
|                  |      |             |          |                |                    |                     | 2         | <i>ad</i>          | 10               | 90 × 125           |                     |                    |                    |                    |
|                  |      |             |          |                |                    |                     | 3         | <i>ad</i>          | 5                | 155 × 205          |                     |                    |                    |                    |
|                  |      |             |          |                |                    |                     | 4         | <i>ad</i>          | 15               | 180 × 235          |                     |                    |                    |                    |
|                  |      |             |          |                |                    |                     | 5         | <i>ad</i>          | 10               | 40 × 275           |                     |                    |                    |                    |
|                  |      |             |          |                |                    |                     | 6         | <i>ad</i>          | 15               | 75 × 220           |                     |                    |                    |                    |
| 5                | 120  | 120         | 240      | 100            | Equal, 5           | 1                   | <i>da</i> | 5                  | 20 × 60          | 240 F <sub>1</sub> | 240 parents         | 240 F <sub>1</sub> | 240 F <sub>1</sub> |                    |
|                  |      |             |          |                |                    | 2                   | <i>da</i> | 10                 | 90 × 125         |                    |                     |                    |                    |                    |
|                  |      |             |          |                |                    | 3                   | <i>da</i> | 5                  | 155 × 205        |                    |                     |                    |                    |                    |
|                  |      |             |          |                |                    | 4                   | <i>da</i> | 15                 | 180 × 235        |                    |                     |                    |                    |                    |
|                  |      |             |          |                |                    | 5                   | <i>da</i> | 10                 | 40 × 275         |                    |                     |                    |                    |                    |
|                  |      |             |          |                |                    | 6                   | <i>da</i> | 15                 | 75 × 220         |                    |                     |                    |                    |                    |
| 6                | 120  | 120         | 240      | 100            | Equal, 5           | 1                   | <i>dd</i> | 5                  | 20 × 60          | 240 F <sub>1</sub> | 240 parents         | 240 F <sub>1</sub> | 240 F <sub>1</sub> |                    |
|                  |      |             |          |                |                    | 2                   | <i>dd</i> | 10                 | 90 × 125         |                    |                     |                    |                    |                    |
|                  |      |             |          |                |                    | 3                   | <i>dd</i> | 5                  | 155 × 205        |                    |                     |                    |                    |                    |

|          |    |     |     |     |     |          |   |          |    |                  |                    |             |                                       |
|----------|----|-----|-----|-----|-----|----------|---|----------|----|------------------|--------------------|-------------|---------------------------------------|
|          |    |     |     |     |     |          | 4 | $dd$     | 15 | $180 \times 235$ |                    |             |                                       |
|          |    |     |     |     |     |          | 5 | $dd$     | 10 | $40 \times 275$  |                    |             |                                       |
|          |    |     |     |     |     |          | 6 | $dd$     | 15 | $75 \times 220$  |                    |             |                                       |
| Part II  | 7  | 120 | 120 | 240 | 100 | Equal, 5 | 1 | $d=0.5a$ | 5  | 25               |                    |             |                                       |
|          |    |     |     |     |     |          | 2 | $d=0.5a$ | 10 | 75               |                    |             |                                       |
|          |    |     |     |     |     |          | 3 | $d=0.5a$ | 5  | 135              | 240 F <sub>1</sub> | 240 parents | 240 F <sub>1</sub> 240 F <sub>1</sub> |
|          |    |     |     |     |     |          | 4 | $d=0.5a$ | 15 | 175              |                    |             |                                       |
|          |    |     |     |     |     |          | 5 | $d=0.5a$ | 10 | 220              |                    |             |                                       |
|          |    |     |     |     |     |          | 6 | $d=0.5a$ | 15 | 270              |                    |             |                                       |
|          | 8  | 120 | 120 | 240 | 100 | Equal, 5 | 1 | $d=a$    | 5  | 25               |                    |             |                                       |
|          |    |     |     |     |     |          | 2 | $d=a$    | 10 | 75               |                    |             |                                       |
|          |    |     |     |     |     |          | 3 | $d=a$    | 5  | 135              | 240 F <sub>1</sub> | 240 parents | 240 F <sub>1</sub> 240 F <sub>1</sub> |
|          |    |     |     |     |     |          | 4 | $d=a$    | 15 | 175              |                    |             |                                       |
|          |    |     |     |     |     |          | 5 | $d=a$    | 10 | 220              |                    |             |                                       |
|          |    |     |     |     |     |          | 6 | $d=a$    | 15 | 270              |                    |             |                                       |
|          | 9  | 120 | 120 | 240 | 100 | Equal, 5 | 1 | $d=2a$   | 5  | 25               |                    |             |                                       |
|          |    |     |     |     |     |          | 2 | $d=2a$   | 10 | 75               |                    |             |                                       |
|          |    |     |     |     |     |          | 3 | $d=2a$   | 5  | 135              | 240 F <sub>1</sub> | 240 parents | 240 F <sub>1</sub> 240 F <sub>1</sub> |
|          |    |     |     |     |     |          | 4 | $d=2a$   | 15 | 175              |                    |             |                                       |
|          |    |     |     |     |     |          | 5 | $d=2a$   | 10 | 220              |                    |             |                                       |
|          |    |     |     |     |     |          | 6 | $d=2a$   | 15 | 270              |                    |             |                                       |
| Part III | 10 | 80  | 80  | 80  | 100 | Equal, 5 | 1 | $a$      | 5  | 20               |                    |             |                                       |
|          |    |     |     |     |     |          | 2 | $d$      | 5  | 85               |                    |             |                                       |
|          |    |     |     |     |     |          | 3 | $aa$     | 5  | $10 \times 30$   | 160 parents+       |             |                                       |
|          |    |     |     |     |     |          | 4 | $ad$     | 5  | $40 \times 55$   | 80 F <sub>1</sub>  |             |                                       |
|          |    |     |     |     |     |          | 5 | $da$     | 5  | $45 \times 80$   |                    |             |                                       |
|          |    |     |     |     |     |          | 6 | $dd$     | 5  | $65 \times 95$   |                    |             |                                       |
|          | 11 | 60  | 60  | 120 | 100 | Equal, 5 | 1 | $a$      | 5  | 20               |                    |             |                                       |
|          |    |     |     |     |     |          | 2 | $d$      | 5  | 85               |                    |             |                                       |
|          |    |     |     |     |     |          | 3 | $aa$     | 5  | $10 \times 30$   | 120 parents+       |             |                                       |
|          |    |     |     |     |     |          | 4 | $ad$     | 5  | $40 \times 55$   | 120 F <sub>1</sub> |             |                                       |
|          |    |     |     |     |     |          | 5 | $da$     | 5  | $45 \times 80$   |                    |             |                                       |
|          |    |     |     |     |     |          | 6 | $dd$     | 5  | $65 \times 95$   |                    |             |                                       |
|          | 12 | 48  | 48  | 144 | 100 | Equal, 5 | 1 | $a$      | 5  | 20               |                    |             |                                       |
|          |    |     |     |     |     |          | 2 | $d$      | 5  | 85               |                    |             |                                       |
|          |    |     |     |     |     |          | 3 | $aa$     | 5  | $10 \times 30$   | 96 parents+        |             |                                       |
|          |    |     |     |     |     |          | 4 | $ad$     | 5  | $40 \times 55$   | 144 F <sub>1</sub> |             |                                       |
|          |    |     |     |     |     |          | 5 | $da$     | 5  | $45 \times 80$   |                    |             |                                       |

---

|    |    |    |     |     |          |   |           |   |         |                    |
|----|----|----|-----|-----|----------|---|-----------|---|---------|--------------------|
|    |    |    |     |     |          | 6 | <i>dd</i> | 5 | 65 × 95 |                    |
| 13 | 40 | 40 | 160 | 100 | Equal, 5 | 1 | <i>a</i>  | 5 | 20      |                    |
|    |    |    |     |     |          | 2 | <i>d</i>  | 5 | 85      |                    |
|    |    |    |     |     |          | 3 | <i>aa</i> | 5 | 10 × 30 | 80 parents+        |
|    |    |    |     |     |          | 4 | <i>ad</i> | 5 | 40 × 55 | 160 F <sub>1</sub> |
|    |    |    |     |     |          | 5 | <i>da</i> | 5 | 45 × 80 |                    |
|    |    |    |     |     |          | 6 | <i>dd</i> | 5 | 65 × 95 |                    |
| 14 | 34 | 34 | 172 | 100 | Equal, 5 | 1 | <i>a</i>  | 5 | 20      |                    |
|    |    |    |     |     |          | 2 | <i>d</i>  | 5 | 85      |                    |
|    |    |    |     |     |          | 3 | <i>aa</i> | 5 | 10 × 30 | 68 parents+        |
|    |    |    |     |     |          | 4 | <i>ad</i> | 5 | 40 × 55 | 172 F <sub>1</sub> |
|    |    |    |     |     |          | 5 | <i>da</i> | 5 | 45 × 80 |                    |
|    |    |    |     |     |          | 6 | <i>dd</i> | 5 | 65 × 95 |                    |
| 15 | 30 | 30 | 180 | 100 | Equal, 5 | 1 | <i>a</i>  | 5 | 20      |                    |
|    |    |    |     |     |          | 2 | <i>d</i>  | 5 | 85      |                    |
|    |    |    |     |     |          | 3 | <i>aa</i> | 5 | 10 × 30 | 60 parents+        |
|    |    |    |     |     |          | 4 | <i>ad</i> | 5 | 40 × 55 | 180 F <sub>1</sub> |
|    |    |    |     |     |          | 5 | <i>da</i> | 5 | 45 × 80 |                    |
|    |    |    |     |     |          | 6 | <i>dd</i> | 5 | 65 × 95 |                    |
| 16 | 26 | 26 | 188 | 100 | Equal, 5 | 1 | <i>a</i>  | 5 | 20      |                    |
|    |    |    |     |     |          | 2 | <i>d</i>  | 5 | 85      |                    |
|    |    |    |     |     |          | 3 | <i>aa</i> | 5 | 10 × 30 | 52 parents+        |
|    |    |    |     |     |          | 4 | <i>ad</i> | 5 | 40 × 55 | 188 F <sub>1</sub> |
|    |    |    |     |     |          | 5 | <i>da</i> | 5 | 45 × 80 |                    |
|    |    |    |     |     |          | 6 | <i>dd</i> | 5 | 65 × 95 |                    |
| 17 | 15 | 15 | 225 | 100 | Equal, 5 | 1 | <i>a</i>  | 5 | 20      |                    |
|    |    |    |     |     |          | 2 | <i>d</i>  | 5 | 85      |                    |
|    |    |    |     |     |          | 3 | <i>aa</i> | 5 | 10 × 30 | 30 parents+        |
|    |    |    |     |     |          | 4 | <i>ad</i> | 5 | 40 × 55 | 225 F <sub>1</sub> |
|    |    |    |     |     |          | 5 | <i>da</i> | 5 | 45 × 80 |                    |
|    |    |    |     |     |          | 6 | <i>dd</i> | 5 | 65 × 95 |                    |

---

**Table S2** | Comparisons of trait phenotype, general combining ability (GCA), specific combining ability (SCA) and mid-parental heterosis (MPH) in the genetic dissection of heterosis under additive, dominance, *aa*, *ad*, *da* and *dd* genetic models using Monte Carlo simulation experiments

| QTL       | True value |        |        | Estimate         |                     |                     |           |                     |                     |                     |                     |           |                  |                     |                     |                     |                     |                     |                      |  |       |
|-----------|------------|--------|--------|------------------|---------------------|---------------------|-----------|---------------------|---------------------|---------------------|---------------------|-----------|------------------|---------------------|---------------------|---------------------|---------------------|---------------------|----------------------|--|-------|
|           | Posi (cM)  | Effect | $r^2$  | Trait phenotype  |                     |                     |           |                     |                     | GCA                 |                     |           |                  |                     |                     |                     |                     |                     |                      |  |       |
|           |            |        |        | Posi (cM)        | <i>a</i>            | <i>d</i>            | <i>aa</i> | <i>ad</i>           | <i>da</i>           | <i>dd</i>           | Power(%)            | Posi (cM) | <i>a</i>         | <i>d</i>            | <i>aa</i>           | <i>ad</i>           | <i>da</i>           | <i>dd</i>           | Power(%)             |  |       |
| <i>a</i>  | 25         | 1.5811 | 0.05   | 24.99<br>(0.34)  | 1.6386<br>(0.4046)  | -0.0189<br>(0.4530) |           |                     |                     |                     |                     | 85.0      | 25.00<br>(0.000) | 0.7744<br>(0.0592)  | -0.0001<br>(0.0349) |                     |                     |                     |                      |  | 100.0 |
|           | 75         | 2.2361 | 0.10   | 75.00<br>(0.00)  | 2.2179<br>(0.3593)  | -0.0104<br>(0.4303) |           |                     |                     |                     |                     | 99.5      | 75.00<br>(0.00)  | 1.0917<br>(0.0806)  | -0.0001<br>(0.0349) |                     |                     |                     |                      |  | 100.0 |
|           | 135        | 1.5811 | 0.05   | 135.01<br>(0.17) | 1.6444<br>(0.3250)  | -0.0175<br>(0.4260) |           |                     |                     |                     |                     | 85.7      | 135.00<br>(0.00) | 0.7707<br>(0.0596)  | -0.0001<br>(0.0349) |                     |                     |                     |                      |  | 100.0 |
|           | 175        | 2.7386 | 0.15   | 174.99<br>(0.16) | 2.7093<br>(0.3594)  | 0.0135<br>(0.4181)  |           |                     |                     |                     |                     | 99.8      | 175.00<br>(0.00) | 1.3406<br>(0.0855)  | -0.0001<br>(0.0349) |                     |                     |                     |                      |  | 100.0 |
|           | 220        | 2.2361 | 0.10   | 219.97<br>(0.69) | 2.2096<br>(0.4437)  | -0.0059<br>(0.4475) |           |                     |                     |                     |                     | 99.4      | 220.00<br>(0.00) | 1.0922<br>(0.0787)  | -0.0001<br>(0.0349) |                     |                     |                     |                      |  | 100.0 |
|           | 270        | 2.7386 | 0.15   | 270.00<br>(0.06) | 2.7117<br>(0.3871)  | 0.0147<br>(0.4641)  |           |                     |                     |                     |                     | 100.0     | 270.00<br>(0.00) | 1.3363<br>(0.0915)  | -0.0001<br>(0.0349) |                     |                     |                     |                      |  | 100.0 |
| <i>d</i>  | 25         | 2.2361 | 0.05   | 25.00<br>(0.07)  | 0.0096<br>(0.2978)  | 2.2850<br>(0.4158)  |           |                     |                     |                     |                     | 87.2      | 25.01<br>(0.66)  | 0.0095<br>(0.1252)  | -0.0108<br>(0.0059) |                     |                     |                     |                      |  | 26.9  |
|           | 75         | 3.1623 | 0.10   | 75.00<br>(0.22)  | 0.0113<br>(0.2985)  | 3.1371<br>(0.4813)  |           |                     |                     |                     |                     | 99.9      | 75.00<br>(0.77)  | -0.0076<br>(0.1563) | -0.0107<br>(0.0061) |                     |                     |                     |                      |  | 42.3  |
|           | 135        | 2.2361 | 0.05   | 135.00<br>(0.07) | 0.0107<br>(0.3253)  | 2.3163<br>(0.3983)  |           |                     |                     |                     |                     | 86.6      | 134.87<br>(0.92) | -0.0038<br>(0.1264) | -0.0109<br>(0.0060) |                     |                     |                     |                      |  | 26.1  |
|           | 175        | 3.8730 | 0.15   | 175.00<br>(0.14) | -0.0005<br>(0.3411) | 3.8639<br>(0.4689)  |           |                     |                     |                     |                     | 100.0     | 175.01<br>(0.24) | -0.0044<br>(0.1721) | -0.0107<br>(0.0062) |                     |                     |                     |                      |  | 51.5  |
|           | 220        | 3.1623 | 0.10   | 220.00<br>(0.01) | 0.0005<br>(0.3885)  | 3.1456<br>(0.4544)  |           |                     |                     |                     |                     | 99.9      | 220.01<br>(0.25) | 0.00005<br>(0.1498) | -0.0108<br>(0.0063) |                     |                     |                     |                      |  | 40.0  |
|           | 270        | 3.8730 | 0.15   | 270.02<br>(0.50) | 0.0079<br>(0.3046)  | 3.8482<br>(0.4921)  |           |                     |                     |                     |                     | 100.0     | 269.96<br>(0.63) | 0.0075<br>(0.1733)  | -0.0108<br>(0.0064) |                     |                     |                     |                      |  | 51.0  |
| <i>aa</i> | 20         | 60     | 2.2361 | 0.05             | 19.91<br>(2.59)     | 60.01<br>(0.22)     |           | 2.3059<br>(0.4438)  | 0.0001<br>(0.6016)  | -0.0080<br>(0.5968) | 0.0147<br>(0.8694)  | 85.4      | 19.99<br>(0.33)  | 60.00<br>(0.00)     |                     | 0.5477<br>(0.0415)  | -0.0009<br>(0.0686) | 0.0014<br>(0.0698)  | 0.0001<br>(0.0178)   |  | 100.0 |
|           | 90         | 125    | 3.1623 | 0.10             | 90.00<br>(0.87)     | 125.01<br>(0.35)    |           | 3.1540<br>(0.5016)  | -0.0245<br>(0.6219) | -0.0145<br>(0.6010) | 0.0093<br>(0.8707)  | 99.4      | 90.00<br>(0.07)  | 125.00<br>(0.03)    |                     | 0.7780<br>(0.0443)  | -0.0013<br>(0.0788) | -0.0031<br>(0.0796) | 0.0001<br>(0.0178)   |  | 100.0 |
|           | 155        | 205    | 2.2361 | 0.05             | 155.00<br>(0.00)    | 205.03<br>(0.84)    |           | 2.3237<br>(0.4190)  | 0.0139<br>(0.5825)  | 0.0090<br>(0.6114)  | 0.0115<br>(0.8336)  | 85.2      | 155.00<br>(0.01) | 205.00<br>(0.03)    |                     | 0.5498<br>(0.0319)  | -0.0044<br>(0.0702) | -0.0030<br>(0.0709) | 0.0001<br>(0.0178)   |  | 100.0 |
|           | 180        | 235    | 3.8730 | 0.15             | 179.99<br>(0.46)    | 234.97<br>(0.67)    |           | 3.8299<br>(0.5308)  | 0.0150<br>(0.6070)  | 0.0022<br>(0.6013)  | 0.0020<br>(0.8225)  | 100.0     | 180.00<br>(0.04) | 235.00<br>(0.05)    |                     | 0.9514<br>(0.0538)  | 0.0009<br>(0.0787)  | -0.0007<br>(0.0758) | 0.0001<br>(0.0178)   |  | 100.0 |
|           | 40         | 275    | 3.1623 | 0.10             | 40.00<br>(0.02)     | 274.93<br>(2.09)    |           | 3.1298<br>(0.5024)  | -0.0411<br>(0.6111) | 0.0064<br>(0.6223)  | -0.0126<br>(0.8590) | 99.1      | 40.00<br>(0.04)  | 275.00<br>(0.07)    |                     | 0.7769<br>(0.0472)  | 0.0011<br>(0.0767)  | -0.0031<br>(0.0753) | -0.0001<br>(0.0178)  |  | 100.0 |
|           | 75         | 220    | 3.8730 | 0.15             | 74.99<br>(0.61)     | 220.01<br>(0.21)    |           | 3.8575<br>(0.5159)  | 0.0101<br>(0.5753)  | 0.0087<br>(0.6172)  | -0.0055<br>(0.8637) | 99.9      | 75.00<br>(0.06)  | 220.00<br>(0.05)    |                     | 0.9522<br>(0.0543)  | -0.0050<br>(0.0770) | 0.0024<br>(0.0806)  | 0.0001<br>(0.0178)   |  | 100.0 |
| <i>ad</i> | 20         | 60     | 3.1623 | 0.05             | 20.07<br>(3.00)     | 60.00<br>(0.08)     |           | -0.0124<br>(0.4217) | 3.2726<br>(0.5721)  | -0.0136<br>(0.6072) | 0.0126<br>(0.8662)  | 86.1      | 19.92<br>(1.53)  | 60.19<br>(1.51)     |                     | 0.0087<br>(0.1182)  | -0.0154<br>(0.0489) | 0.0086<br>(0.0771)  | -0.0001<br>(0.0037)  |  | 12.9  |
|           | 90         | 125    | 4.4721 | 0.10             | 89.97<br>(0.77)     | 124.99<br>(0.21)    |           | 0.0159<br>(0.4183)  | 4.4339<br>(0.6949)  | -0.0177<br>(0.5989) | 0.0349<br>(0.8546)  | 99.8      | 89.96<br>(0.66)  | 125.00<br>(0.93)    |                     | -0.0004<br>(0.1341) | -0.0206<br>(0.0515) | 0.0046<br>(0.0826)  | 0.000003<br>(0.0038) |  | 23.2  |
|           | 155        | 205    | 3.1623 | 0.05             | 155.01<br>(0.51)    | 204.99<br>(0.16)    |           | -0.0231<br>(0.4475) | 3.2707<br>(0.6015)  | 0.0204<br>(0.5946)  | -0.0071<br>(0.8541) | 88.5      | 155.04<br>(0.42) | 205.19<br>(1.39)    |                     | 0.0035<br>(0.1143)  | -0.0148<br>(0.0487) | -0.0047<br>(0.0738) | -0.0002<br>(0.0036)  |  | 13.9  |
|           | 180        | 235    | 5.4772 | 0.15             | 180.02<br>(0.49)    | 235.01<br>(0.34)    |           | -0.0049<br>(0.4535) | 5.4358<br>(0.7158)  | 0.0136<br>(0.6194)  | 0.0151<br>(0.8421)  | 100.0     | 179.99<br>(0.67) | 235.04<br>(0.68)    |                     | 0.0066<br>(0.1472)  | -0.0228<br>(0.0529) | -0.0041<br>(0.0808) | 0.0001<br>(0.0039)   |  | 33.4  |

|           |     |     |        |      |                  |                  |                     |                     |                     |                     |       |                  |                  |                     |                     |                     |                      |      |
|-----------|-----|-----|--------|------|------------------|------------------|---------------------|---------------------|---------------------|---------------------|-------|------------------|------------------|---------------------|---------------------|---------------------|----------------------|------|
| <i>da</i> | 40  | 275 | 4.4721 | 0.10 | 40.00<br>(0.01)  | 275.00<br>(0.07) | -0.0032<br>(0.4406) | 4.4584<br>(0.6939)  | -0.0228<br>(0.6141) | -0.0270<br>(0.8724) | 99.9  | 40.02<br>(0.89)  | 274.93<br>(0.72) | 0.0079<br>(0.1253)  | -0.0188<br>(0.0447) | 0.0028<br>(0.0858)  | -0.00002<br>(0.0039) | 22.0 |
|           | 75  | 220 | 5.4772 | 0.15 | 75.00<br>(0.09)  | 220.02<br>(0.55) | 0.0222<br>(0.4497)  | 5.4846<br>(0.7634)  | -0.0172<br>(0.5926) | 0.0378<br>(0.8372)  | 100.0 | 74.92<br>(0.88)  | 220.04<br>(1.00) | 0.0132<br>(0.1464)  | -0.0183<br>(0.0493) | 0.0076<br>(0.0816)  | -0.0002<br>(0.0040)  | 31.7 |
|           | 20  | 60  | 3.1623 | 0.05 | 19.96<br>(1.21)  | 59.86<br>(3.92)  | -0.0052<br>(0.4819) | -0.0184<br>(0.6150) | 3.2686<br>(0.6652)  | -0.0221<br>(0.8392) | 85.8  | 20.37<br>(2.84)  | 60.17<br>(4.39)  | -0.0032<br>(0.1105) | 0.0085<br>(0.0806)  | -0.0102<br>(0.0468) | 0.0002<br>(0.0038)   | 11.9 |
|           | 90  | 125 | 4.4721 | 0.10 | 90.00<br>(0.00)  | 124.91<br>(2.24) | 0.0067<br>(0.4562)  | 0.0101<br>(0.5995)  | 4.4312<br>(0.7386)  | -0.0007<br>(0.8136) | 99.7  | 90.31<br>(8.57)  | 124.98<br>(0.57) | 0.0078<br>(0.1247)  | -0.0056<br>(0.0788) | -0.0171<br>(0.0500) | 0.0002<br>(0.0037)   | 23.5 |
|           | 155 | 205 | 3.1623 | 0.05 | 155.02<br>(0.27) | 204.99<br>(0.58) | -0.0089<br>(0.4576) | -0.0047<br>(0.6128) | 3.2314<br>(0.6205)  | -0.0059<br>(0.8847) | 85.4  | 155.04<br>(0.46) | 204.83<br>(1.71) | -0.0022<br>(0.1108) | -0.0143<br>(0.0734) | -0.0103<br>(0.0462) | 0.0004<br>(0.0037)   | 11.8 |
|           | 180 | 235 | 5.4772 | 0.15 | 179.98<br>(0.53) | 234.88<br>(3.83) | -0.0067<br>(0.4559) | 0.0055<br>(0.6162)  | 5.4453<br>(0.8243)  | 0.0495<br>(0.8552)  | 100.0 | 180.13<br>(2.16) | 235.01<br>(0.90) | 0.0116<br>(0.1422)  | -0.0053<br>(0.0796) | -0.0195<br>(0.0503) | 0.0002<br>(0.0037)   | 34.1 |
|           | 40  | 275 | 4.4721 | 0.10 | 39.99<br>(1.29)  | 275.00<br>(0.34) | -0.0069<br>(0.4541) | 0.0197<br>(0.6136)  | 4.4347<br>(0.7244)  | 0.0110<br>(0.8279)  | 99.8  | 39.96<br>(0.64)  | 275.06<br>(0.84) | 0.0001<br>(0.1260)  | -0.0021<br>(0.0724) | -0.0215<br>(0.0474) | 0.000008<br>(0.0037) | 24.7 |
|           | 75  | 220 | 5.4772 | 0.15 | 75.00<br>(0.32)  | 220.01<br>(0.34) | 0.0081<br>(0.4607)  | 0.0098<br>(0.6022)  | 5.4277<br>(0.8416)  | 0.0388<br>(0.8625)  | 100.0 | 74.96<br>(0.82)  | 220.02<br>(0.33) | 0.0006<br>(0.1464)  | 0.0033<br>(0.0801)  | -0.0168<br>(0.0473) | 0.0003<br>(0.0040)   | 31.8 |
|           | 20  | 60  | 4.4721 | 0.05 | 19.98<br>(0.41)  | 59.99<br>(0.34)  | 0.0110<br>(0.4179)  | 0.0095<br>(0.5991)  | -0.0073<br>(0.5998) | 4.5834<br>(0.8441)  | 86.0  | 19.92<br>(0.75)  | 59.94<br>(1.65)  | 0.0035<br>(0.1271)  | -0.0006<br>(0.0438) | -0.0018<br>(0.0482) | -0.0077<br>(0.0046)  | 26.5 |
|           | 90  | 125 | 6.3246 | 0.10 | 89.98<br>(1.26)  | 124.99<br>(0.32) | 0.0100<br>(0.4351)  | 0.0102<br>(0.6171)  | -0.0082<br>(0.5954) | 6.2686<br>(0.9940)  | 99.8  | 90.00<br>(0.59)  | 124.98<br>(0.60) | -0.0023<br>(0.1512) | 0.0026<br>(0.0500)  | -0.0006<br>(0.0470) | -0.0072<br>(0.0045)  | 42.5 |
| <i>dd</i> | 155 | 205 | 4.4721 | 0.05 | 155.04<br>(1.18) | 205.00<br>(0.04) | -0.0088<br>(0.4223) | -0.0012<br>(0.6051) | -0.0051<br>(0.5773) | 4.6106<br>(0.8283)  | 88.2  | 155.00<br>(0.86) | 205.07<br>(1.97) | -0.0075<br>(0.1277) | -0.0005<br>(0.0482) | -0.0002<br>(0.0478) | -0.0079<br>(0.0048)  | 27.4 |
|           | 180 | 235 | 7.7460 | 0.15 | 180.00<br>(0.10) | 235.01<br>(0.36) | -0.0029<br>(0.4341) | -0.0017<br>(0.6236) | 0.0198<br>(0.6123)  | 7.6976<br>(1.0334)  | 100.0 | 180.00<br>(0.09) | 235.00<br>(0.33) | 0.0130<br>(0.1705)  | 0.00001<br>(0.0472) | 0.0022<br>(0.0465)  | -0.0076<br>(0.0047)  | 47.3 |
|           | 40  | 275 | 6.3246 | 0.10 | 40.01<br>(0.25)  | 274.99<br>(0.23) | 0.00002<br>(0.4429) | 0.0342<br>(0.6207)  | -0.0021<br>(0.6138) | 6.3201<br>(0.9553)  | 99.6  | 40.01<br>(0.94)  | 275.04<br>(0.55) | -0.0088<br>(0.1520) | 0.0015<br>(0.0468)  | -0.0057<br>(0.0464) | -0.0074<br>(0.0044)  | 42.3 |
|           | 75  | 220 | 7.7460 | 0.15 | 75.00<br>(0.15)  | 220.00<br>(0.13) | 0.0090<br>(0.4405)  | -0.0296<br>(0.6035) | 0.0148<br>(0.6101)  | 7.6949<br>(1.0650)  | 100.0 | 75.03<br>(0.50)  | 219.92<br>(1.13) | 0.0058<br>(0.1679)  | -0.0004<br>(0.0486) | 0.0021<br>(0.0487)  | -0.0073<br>(0.0048)  | 48.2 |







**Table S3** | Comparisons of trait phenotype, general combining ability (GCA), specific combining ability (SCA) and mid-parental heterosis (MPH) in the genetic dissection of heterosis under partial-, complete-, and over-dominance models using Monte Carlo simulation experiments

| QTL1                 |           | $d=0.5a$  |         |         |       | $d=a$     |         |         |       | $d=2a$    |         |         |       |
|----------------------|-----------|-----------|---------|---------|-------|-----------|---------|---------|-------|-----------|---------|---------|-------|
|                      |           | Posi (cM) | $a$     | $d$     | $r^2$ | Posi (cM) | $a$     | $d$     | $r^2$ | Posi (cM) | $a$     | $d$     | $r^2$ |
| True value           |           | 25        | 1.4907  | 0.7454  | 0.05  | 25        | 1.2910  | 1.2910  | 0.05  | 25        | 0.9129  | 1.8257  | 0.05  |
| Trait phenotype      | Estimate  | 24.99     | 1.5632  | 0.6934  |       | 25.02     | 1.0888  | 1.0545  |       | 25.09     | 0.7256  | 1.7099  |       |
|                      | SD        | 0.18      | 0.4009  | 0.4647  |       | 0.49      | 1.0466  | 0.8710  |       | 0.99      | 0.9099  | 0.8784  |       |
|                      | Power(%)  | 66.3      |         |         |       | 43.2      |         |         |       | 50.5      |         |         |       |
| GCA                  | Estimate  | 25.00     | 0.7298  | -0.0024 |       | 24.99     | 0.6350  | -0.0029 |       | 25.00     | 0.4496  | -0.0051 |       |
|                      | SD        | 0.00      | 0.0543  | 0.0323  |       | 0.09      | 0.0662  | 0.0271  |       | 0.00      | 0.0633  | 0.0200  |       |
|                      | Power (%) | 100.0     |         |         |       | 100.0     |         |         |       | 100.0     |         |         |       |
| SCA                  | Estimate  | 24.52     | 0.0051  | 1.6513  |       | 25.27     | 0.0676  | 1.7220  |       | 24.99     | 0.0232  | 1.9997  |       |
|                      | SD        | 2.18      | 0.3768  | 0.3858  |       | 1.55      | 0.3031  | 0.6905  |       | 0.11      | 0.3094  | 0.4000  |       |
|                      | Power (%) | 2.1       |         |         |       | 9.2       |         |         |       | 54.9      |         |         |       |
| Mid-parent heterosis | Estimate  | 25.38     | -0.0511 | 1.4640  |       | 25.18     | -0.1152 | 2.2374  |       | 24.94     | -0.0547 | 2.4434  |       |
|                      | SD        | 3.20      | 1.1177  | 1.1086  |       | 1.44      | 0.4359  | 0.5727  |       | 1.04      | 0.4413  | 0.7005  |       |
|                      | Power (%) | 1.3       |         |         |       | 4.9       |         |         |       | 21.2      |         |         |       |
| QTL2                 |           | Posi (cM) | $a$     | $d$     | $r^2$ | Posi (cM) | $a$     | $d$     | $r^2$ | Posi (cM) | $a$     | $d$     | $r^2$ |
| True value           |           | 75        | 2.1082  | 1.0541  | 0.10  | 75        | 1.8257  | 1.8257  | 0.10  | 75        | 1.2910  | 2.5820  | 0.10  |
| Trait phenotype      | Estimate  | 75.00     | 2.0283  | 0.9304  |       | 74.96     | 1.3947  | 1.2668  |       | 75.01     | 0.7923  | 1.9952  |       |
|                      | SD        | 0.14      | 0.4816  | 0.4264  |       | 0.53      | 0.7438  | 0.6092  |       | 0.53      | 0.6763  | 0.9143  |       |
|                      | Power (%) | 95.7      |         |         |       | 79.3      |         |         |       | 81.3      |         |         |       |

|                      |           |           |          |          |                       |  |           |          |          |                       |  |           |          |          |                       |
|----------------------|-----------|-----------|----------|----------|-----------------------|--|-----------|----------|----------|-----------------------|--|-----------|----------|----------|-----------------------|
| GCA                  | Estimate  | 75.00     | 1.0329   | -0.0024  |                       |  | 75.00     | 0.8958   | -0.0029  |                       |  | 75.00     | 0.6359   | -0.0051  |                       |
|                      | SD        | 0.00      | 0.0774   | 0.0323   |                       |  | 0.01      | 0.0844   | 0.0271   |                       |  | 0.00      | 0.0884   | 0.0200   |                       |
|                      | Power (%) | 100.0     |          |          |                       |  | 100.0     |          |          |                       |  | 100.0     |          |          |                       |
| SCA                  | Estimate  | 74.67     | -0.0769  | 1.7465   |                       |  | 75.04     | -0.0010  | 2.0765   |                       |  | 75.00     | -0.0014  | 2.5790   |                       |
|                      | SD        | 2.18      | 0.3788   | 0.3864   |                       |  | 0.56      | 0.3084   | 0.4083   |                       |  | 0.12      | 0.3184   | 0.4594   |                       |
|                      | Power (%) | 7.5       |          |          |                       |  | 45.5      |          |          |                       |  | 92.2      |          |          |                       |
| Mid-parent heterosis | Estimate  | 74.47     | -0.0743  | 1.9853   |                       |  | 75.00     | -0.0477  | 2.6145   |                       |  | 75.00     | -0.0779  | 3.0142   |                       |
|                      | SD        | 2.26      | 0.5779   | 0.7917   |                       |  | 0.00      | 0.4120   | 0.4394   |                       |  | 0.10      | 0.4195   | 0.5689   |                       |
|                      | Power (%) | 3.8       |          |          |                       |  | 22.1      |          |          |                       |  | 63.4      |          |          |                       |
| QTL3                 |           | Posi (cM) | <i>a</i> | <i>d</i> | <i>r</i> <sup>2</sup> |  | Posi (cM) | <i>a</i> | <i>d</i> | <i>r</i> <sup>2</sup> |  | Posi (cM) | <i>a</i> | <i>d</i> | <i>r</i> <sup>2</sup> |
| True value           |           | 135       | 1.4907   | 0.7454   | 0.05                  |  | 135       | 1.2910   | 1.2910   | 0.05                  |  | 135       | 0.9129   | 1.8257   | 0.05                  |
| Trait phenotype      | Estimate  | 134.99    | 1.5813   | 0.6895   |                       |  | 134.86    | 1.2246   | 1.0287   |                       |  | 135.01    | 1.2290   | 1.8104   |                       |
|                      | SD        | 0.12      | 0.4825   | 0.4773   |                       |  | 1.19      | 1.0158   | 0.7531   |                       |  | 0.56      | 0.8942   | 0.8360   |                       |
|                      | Power (%) | 64.9      |          |          |                       |  | 44.8      |          |          |                       |  | 45.1      |          |          |                       |
| GCA                  | Estimate  | 135.00    | 0.7280   | -0.0024  |                       |  | 135.00    | 0.6306   | -0.0029  |                       |  | 135.00    | 0.4464   | -0.0051  |                       |
|                      | SD        | 0.00      | 0.0593   | 0.0323   |                       |  | 0.00      | 0.0613   | 0.0271   |                       |  | 0.00      | 0.0660   | 0.0200   |                       |
|                      | Power (%) | 100.0     |          |          |                       |  | 100.0     |          |          |                       |  | 100.0     |          |          |                       |
| SCA                  | Estimate  | 135.00    | 0.4503   | 1.4810   |                       |  | 135.08    | 0.0708   | 1.7970   |                       |  | 135.01    | 0.0115   | 2.0433   |                       |
|                      | SD        | 1.25      | 0.2604   | 0.4830   |                       |  | 0.91      | 0.2916   | 0.5485   |                       |  | 0.14      | 0.2931   | 0.3655   |                       |
|                      | Power (%) | 1.6       |          |          |                       |  | 12.1      |          |          |                       |  | 53.8      |          |          |                       |
| Mid-parent heterosis | Estimate  | 136.82    | -0.0433  | 1.7546   |                       |  | 134.78    | 0.0125   | 2.4241   |                       |  | 135.04    | -0.0497  | 2.5849   |                       |
|                      | SD        | 4.05      | 0.8944   | 1.0154   |                       |  | 1.49      | 0.4098   | 0.4072   |                       |  | 0.65      | 0.4336   | 0.5117   |                       |

|                      | Power (%) | 0.9       |          |          |       |  | 4.5       |          |          |       |  | 23.7      |          |          |       |
|----------------------|-----------|-----------|----------|----------|-------|--|-----------|----------|----------|-------|--|-----------|----------|----------|-------|
| QTL4                 |           | Posi (cM) | <i>a</i> | <i>d</i> | $r^2$ |  | Posi (cM) | <i>a</i> | <i>d</i> | $r^2$ |  | Posi (cM) | <i>a</i> | <i>d</i> | $r^2$ |
| True value           |           | 175       | 2.5820   | 1.2910   | 0.15  |  | 175       | 2.2361   | 2.2361   | 0.15  |  | 175       | 1.5811   | 3.1623   | 0.15  |
| Trait phenotype      | Estimate  | 175.01    | 2.4041   | 1.0861   |       |  | 174.97    | 1.5055   | 1.4016   |       |  | 174.99    | 0.9701   | 2.1122   |       |
|                      | SD        | 0.17      | 05864    | 0.4060   |       |  | 1.40      | 0.7792   | 0.5759   |       |  | 0.50      | 0.5598   | 0.9275   |       |
|                      | Power (%) | 99.4      |          |          |       |  | 92.2      |          |          |       |  | 95.7      |          |          |       |
| GCA                  | Estimate  | 175.00    | 1.2647   | -0.0024  |       |  | 175.00    | 1.0934   | -0.0029  |       |  | 175.00    | 0.7772   | -0.0051  |       |
|                      | SD        | 0.00      | 0.0964   | 0.0323   |       |  | 0.02      | 0.1078   | 0.0271   |       |  | 0.00      | 0.1138   | 0.0200   |       |
|                      | Power (%) | 100.0     |          |          |       |  | 100.0     |          |          |       |  | 100.0     |          |          |       |
| SCA                  | Estimate  | 175.00    | -0.0170  | 1.8211   |       |  | 175.01    | 0.0219   | 2.3449   |       |  | 175.00    | -0.0012  | 3.0905   |       |
|                      | SD        | 0.00      | 0.2900   | 0.2623   |       |  | 0.35      | 0.3328   | 0.4185   |       |  | 0.06      | 0.3449   | 0.5100   |       |
|                      | Power (%) | 19.1      |          |          |       |  | 75.0      |          |          |       |  | 99.6      |          |          |       |
| Mid-parent heterosis | Estimate  | 174.87    | -0.0386  | 2.1653   |       |  | 174.96    | -0.0923  | 2.7376   |       |  | 175.00    | -0.1102  | 3.4635   |       |
|                      | SD        | 0.80      | 0.4319   | 0.6966   |       |  | 0.74      | 0.4425   | 0.5311   |       |  | 0.17      | 0.4366   | 0.6505   |       |
|                      | Power (%) | 7.7       |          |          |       |  | 50.0      |          |          |       |  | 88.3      |          |          |       |
| QTL5                 |           | Posi (cM) | <i>a</i> | <i>d</i> | $r^2$ |  | Posi (cM) | <i>a</i> | <i>d</i> | $r^2$ |  | Posi (cM) | <i>a</i> | <i>d</i> | $r^2$ |
| True value           |           | 220       | 2.1082   | 1.0541   | 0.10  |  | 220       | 1.8257   | 1.8257   | 0.10  |  | 220       | 1.2910   | 2.5820   | 0.10  |
| Trait phenotype      | Estimate  | 219.87    | 2.0419   | 0.9348   |       |  | 219.70    | 1.3928   | 1.2705   |       |  | 220.00    | 0.8752   | 1.9730   |       |
|                      | SD        | 4.08      | 0.4727   | 0.4276   |       |  | 8.42      | 0.7582   | 0.5952   |       |  | 0.54      | 0.6397   | 0.9100   |       |
|                      | Power (%) | 94.6      |          |          |       |  | 77.5      |          |          |       |  | 81.2      |          |          |       |
| GCA                  | Estimate  | 220.00    | 1.0317   | -0.0024  |       |  | 220.00    | 0.8957   | -0.0029  |       |  | 220.00    | 0.6337   | -0.0051  |       |
|                      | SD        | 0.00      | 0.0801   | 0.0323   |       |  | 0.01      | 0.0787   | 0.0271   |       |  | 0.00      | 0.0902   | 0.0200   |       |

|                      |           |           |          |          |                       |  |           |          |          |                       |  |           |          |          |                       |
|----------------------|-----------|-----------|----------|----------|-----------------------|--|-----------|----------|----------|-----------------------|--|-----------|----------|----------|-----------------------|
|                      | Power (%) | 100.0     |          |          |                       |  | 100.0     |          |          |                       |  | 100.0     |          |          |                       |
| SCA                  | Estimate  | 219.94    | 0.0414   | 1.7468   |                       |  | 219.98    | 0.0143   | 2.1208   |                       |  | 220.00    | 0.0122   | 2.5688   |                       |
|                      | SD        | 1.21      | 0.3352   | 0.3899   |                       |  | 0.28      | 0.3186   | 0.4026   |                       |  | 0.00      | 0.3320   | 0.4536   |                       |
|                      | Power (%) | 8.6       |          |          |                       |  | 43.4      |          |          |                       |  | 91.8      |          |          |                       |
| Mid-parent heterosis | Estimate  | 220.19    | -0.0678  | 2.1797   |                       |  | 220.03    | -0.0569  | 2.5631   |                       |  | 219.99    | -0.0748  | 3.0314   |                       |
|                      | SD        | 0.96      | 0.4954   | 0.3541   |                       |  | 0.34      | 0.4653   | 0.5135   |                       |  | 0.10      | 0.4218   | 0.5809   |                       |
|                      | Power (%) | 2.7       |          |          |                       |  | 23.9      |          |          |                       |  | 61.0      |          |          |                       |
| QTL6                 |           | Posi (cM) | <i>a</i> | <i>d</i> | <i>r</i> <sup>2</sup> |  | Posi (cM) | <i>a</i> | <i>d</i> | <i>r</i> <sup>2</sup> |  | Posi (cM) | <i>a</i> | <i>d</i> | <i>r</i> <sup>2</sup> |
| True value           |           | 270       | 2.5820   | 1.2910   | 0.15                  |  | 270       | 2.2361   | 2.2361   | 0.15                  |  | 270       | 1.5811   | 3.1623   | 0.15                  |
| Trait phenotype      | Estimate  | 270.00    | 2.3977   | 1.0645   |                       |  | 269.92    | 1.4552   | 1.3944   |                       |  | 269.98    | 0.9576   | 2.0999   |                       |
|                      | SD        | 0.07      | 0.5897   | 0.4134   |                       |  | 2.60      | 0.7785   | 0.5948   |                       |  | 0.43      | 0.5729   | 0.9317   |                       |
|                      | Power (%) | 99.4      |          |          |                       |  | 92.9      |          |          |                       |  | 94.4      |          |          |                       |
| GCA                  | Estimate  | 270.00    | 1.2662   | -0.0024  |                       |  | 270.00    | 1.0934   | -0.0029  |                       |  | 270.00    | 0.7725   | -0.0051  |                       |
|                      | SD        | 0.00      | 0.0975   | 0.0323   |                       |  | 0.03      | 0.1053   | 0.0271   |                       |  | 0.00      | 0.1106   | 0.0200   |                       |
|                      | Power (%) | 100.0     |          |          |                       |  | 100.0     |          |          |                       |  | 100.0     |          |          |                       |
| SCA                  | Estimate  | 270.03    | 0.0325   | 1.8047   |                       |  | 270.02    | -0.0141  | 2.3334   |                       |  | 270.00    | 0.0116   | 3.0958   |                       |
|                      | SD        | 0.65      | 0.2968   | 0.4344   |                       |  | 0.37      | 0.3271   | 0.4449   |                       |  | 0.00      | 0.3432   | 0.5159   |                       |
|                      | Power (%) | 17.7      |          |          |                       |  | 76.6      |          |          |                       |  | 98.2      |          |          |                       |
| Mid-parent heterosis | Estimate  | 269.87    | -0.0325  | 2.2862   |                       |  | 270.00    | -0.0935  | 2.7613   |                       |  | 270.00    | -0.1000  | 3.4680   |                       |
|                      | SD        | 1.13      | 0.4408   | 0.3967   |                       |  | 0.67      | 0.4291   | 0.5139   |                       |  | 0.00      | 0.4362   | 0.6241   |                       |
|                      | Power (%) | 7.8       |          |          |                       |  | 47.7      |          |          |                       |  | 88.5      |          |          |                       |

**Table S4** | Genetic basis of heterosis from 2,160,000 simulated F<sub>1</sub> individuals

| QTL               | Heterosis             |                         |        | $r^2$ | Power of QTL detection from phenotypic observation |      |              |              |              |              |
|-------------------|-----------------------|-------------------------|--------|-------|----------------------------------------------------|------|--------------|--------------|--------------|--------------|
|                   | Absolute of Mean (SD) | 95% Confidence interval | CV     |       | $a$                                                | $d$  | $a \times a$ | $a \times d$ | $d \times a$ | $d \times d$ |
| Additive ( $a$ )  | 0.0772<br>(0.2785)    | -7.5097~7.9917          | 72.47  | 0.05  | 85.0                                               |      |              |              |              |              |
|                   |                       |                         |        | 0.10  | 99.5                                               |      |              |              |              |              |
|                   |                       |                         |        | 0.05  | 85.7                                               |      |              |              |              |              |
|                   |                       |                         |        | 0.15  | 99.8                                               |      |              |              |              |              |
|                   |                       |                         |        | 0.10  | 99.4                                               |      |              |              |              |              |
| Dominance ( $d$ ) | 10.28621<br>(0.4402)  | -1.7238~22.6488         | 0.60   | 0.15  | 100.0                                              |      |              |              |              |              |
|                   |                       |                         |        | 0.05  | 87.2                                               |      |              |              |              |              |
|                   |                       |                         |        | 0.10  | 99.9                                               |      |              |              |              |              |
|                   |                       |                         |        | 0.05  | 86.6                                               |      |              |              |              |              |
|                   |                       |                         |        | 0.10  | 99.9                                               |      |              |              |              |              |
| $a \times a$      | 0.1851<br>(0.4317)    | -10.1961~11.8511        | -2.32  | 0.15  | 100.0                                              |      |              |              |              |              |
|                   |                       |                         |        | 0.05  | 85.4                                               |      |              |              |              |              |
|                   |                       |                         |        | 0.10  | 99.4                                               |      |              |              |              |              |
|                   |                       |                         |        | 0.05  | 85.2                                               |      |              |              |              |              |
|                   |                       |                         |        | 0.10  | 99.1                                               |      |              |              |              |              |
| $a \times d$      | 0.2008<br>(0.5303)    | -12.7127~14.3138        | -8.03  | 0.15  | 99.9                                               |      |              |              |              |              |
|                   |                       |                         |        | 0.05  | 100.0                                              |      |              |              |              |              |
|                   |                       |                         |        | 0.10  | 99.9                                               |      |              |              |              |              |
|                   |                       |                         |        | 0.15  | 100.0                                              |      |              |              |              |              |
|                   |                       |                         |        | 0.05  | 86.1                                               |      |              |              |              |              |
| $d \times a$      | 0.1689<br>(0.5141)    | -12.7198~14.2701        | -3.78  | 0.10  | 99.8                                               |      |              |              |              |              |
|                   |                       |                         |        | 0.05  | 88.5                                               |      |              |              |              |              |
|                   |                       |                         |        | 0.15  | 100.0                                              |      |              |              |              |              |
|                   |                       |                         |        | 0.10  | 99.9                                               |      |              |              |              |              |
|                   |                       |                         |        | 0.15  | 100.0                                              |      |              |              |              |              |
| $d \times d$      | 8.4467<br>(0.3425)    | -18.1604~1.4647         | -0.59  | 0.05  |                                                    |      |              |              | 85.8         |              |
|                   |                       |                         |        | 0.10  |                                                    |      |              |              | 99.7         |              |
|                   |                       |                         |        | 0.05  |                                                    |      |              |              | 85.4         |              |
|                   |                       |                         |        | 0.15  |                                                    |      |              |              | 100.0        |              |
|                   |                       |                         |        | 0.10  |                                                    |      |              |              | 99.8         |              |
| $d=0.5a$          | 3.2542<br>(0.3184)    | -5.0630~11.9028         | 1.3203 | 0.15  |                                                    |      |              |              | 100.0        |              |
|                   |                       |                         |        | 0.05  |                                                    |      |              |              | 86.0         |              |
|                   |                       |                         |        | 0.10  |                                                    |      |              |              | 99.8         |              |
|                   |                       |                         |        | 0.05  |                                                    |      |              |              | 88.2         |              |
|                   |                       |                         |        | 0.15  |                                                    |      |              |              | 100.0        |              |
| $d=2a$            | 8.2501<br>(0.3945)    | -2.4574~19.3589         | 0.6670 | 0.15  | 66.3                                               | 66.3 |              |              |              |              |
|                   |                       |                         |        | 0.10  | 95.7                                               | 95.7 |              |              |              |              |
|                   |                       |                         |        | 0.05  | 64.9                                               | 64.9 |              |              |              |              |
|                   |                       |                         |        | 0.15  | 99.4                                               | 99.4 |              |              |              |              |
|                   |                       |                         |        | 0.10  | 94.6                                               | 94.6 |              |              |              |              |
| $d=a$             | 5.7222<br>(0.3474)    | -3.6537~15.4374         | 0.8410 | 0.15  | 99.4                                               | 99.4 |              |              |              |              |
|                   |                       |                         |        | 0.05  | 50.5                                               | 50.5 |              |              |              |              |
|                   |                       |                         |        | 0.10  | 81.3                                               | 81.3 |              |              |              |              |
|                   |                       |                         |        | 0.05  | 45.1                                               | 45.1 |              |              |              |              |
|                   |                       |                         |        | 0.15  | 95.7                                               | 95.7 |              |              |              |              |
| $d=0.5a$          | 3.2542<br>(0.3184)    | -5.0630~11.9028         | 1.3203 | 0.10  | 81.2                                               | 81.2 |              |              |              |              |
|                   |                       |                         |        | 0.15  | 94.4                                               | 94.4 |              |              |              |              |
|                   |                       |                         |        | 0.05  | 43.2                                               | 43.2 |              |              |              |              |
|                   |                       |                         |        | 0.10  | 79.3                                               | 79.3 |              |              |              |              |
|                   |                       |                         |        | 0.05  | 44.8                                               | 44.8 |              |              |              |              |
| $d=2a$            | 8.2501<br>(0.3945)    | -2.4574~19.3589         | 0.6670 | 0.15  | 92.2                                               | 92.2 |              |              |              |              |
|                   |                       |                         |        | 0.10  | 77.5                                               | 77.5 |              |              |              |              |
|                   |                       |                         |        | 0.05  | 43.2                                               | 43.2 |              |              |              |              |
|                   |                       |                         |        | 0.10  | 79.3                                               | 79.3 |              |              |              |              |
|                   |                       |                         |        | 0.15  | 92.9                                               | 92.9 |              |              |              |              |

Table S5 | Comparison of trait phenotype and mid-parental heterosis (MPH) under additive, dominance, *aa*, *ad*, *da*, and *dd* effects in F<sub>2</sub>

| QTL | Type                   | True value |     |        |       | Estimates from trait phenotype |                  |                    |           | Estimates from MPH |                  |                    |           |
|-----|------------------------|------------|-----|--------|-------|--------------------------------|------------------|--------------------|-----------|--------------------|------------------|--------------------|-----------|
|     |                        | Posi. (cM) |     | Effect | $r^2$ | Posi. (cM)                     |                  | Effect             | Power (%) | Posi. (cM)         |                  | Effect             | Power (%) |
| 1   | Additive ( <i>a</i> )  | 70         |     | 0.7071 | 0.10  | 70.10<br>(2.11)                |                  | 0.7048<br>(0.0969) | 83.9      | 70.09<br>(2.09)    |                  | 0.6976<br>(0.0962) | 83.9      |
| 2   | Dominance ( <i>d</i> ) | 145        |     | 1.000  | 0.10  | 144.96<br>(1.02)               |                  | 0.9911<br>(0.1367) | 100.0     | 144.97<br>(0.99)   |                  | 0.9818<br>(0.1357) | 100.0     |
| 3   | <i>a</i> × <i>a</i>    | 35         | 285 | 1.000  | 0.10  | 34.93<br>(2.57)                | 284.98<br>(2.33) | 0.9818<br>(0.1418) | 97.0      | 34.93<br>(2.57)    | 284.98<br>(2.34) | 0.9730<br>(0.1392) | 96.9      |
| 4   | <i>a</i> × <i>d</i>    | 95         | 170 | 1.4142 | 0.10  | 94.60<br>(1.69)                | 169.98<br>(1.23) | 1.3981<br>(0.1977) | 99.5      | 94.60<br>(1.69)    | 169.98<br>(1.20) | 1.3834<br>(0.1966) | 99.5      |
| 5   | <i>d</i> × <i>a</i>    | 120        | 235 | 1.4142 | 0.10  | 120.00<br>(1.74)               | 235.00<br>(2.30) | 1.3935<br>(0.1893) | 99.0      | 120.00<br>(1.74)   | 235.00<br>(2.30) | 1.3800<br>(0.1874) | 98.9      |
| 6   | <i>d</i> × <i>d</i>    | 195        | 255 | 2.000  | 0.10  | 194.93<br>(0.63)               | 254.98<br>(1.08) | 1.9738<br>(0.2676) | 99.7      | 194.93<br>(0.63)   | 254.98<br>(1.07) | 1.9538<br>(0.1712) | 99.7      |

\*The sample size was equal to 300.

**Table S6** | The true and estimated values for QTL parameters using real molecular marker dataset and the 0.01 significance level

| QTL  | QTL Type  | True value |           |        |           |          | Estimate        |                 |           |           |                     |                    |                     |                     |           |                    |                     |           |           |                     |                     |                     |                     |      |
|------|-----------|------------|-----------|--------|-----------|----------|-----------------|-----------------|-----------|-----------|---------------------|--------------------|---------------------|---------------------|-----------|--------------------|---------------------|-----------|-----------|---------------------|---------------------|---------------------|---------------------|------|
|      |           |            |           |        |           |          | Trait phenotype |                 |           |           |                     |                    | GCA                 |                     |           |                    |                     |           |           |                     |                     |                     |                     |      |
|      |           | Marker     | Posi (cM) | Effect | Posi (cM) | <i>a</i> | <i>d</i>        | <i>aa</i>       | <i>ad</i> | <i>da</i> | <i>dd</i>           | Power (%)          | Posi (cM)           | <i>a</i>            | <i>d</i>  | <i>aa</i>          | <i>ad</i>           | <i>da</i> | <i>dd</i> | Power (%)           |                     |                     |                     |      |
| QTL1 |           | A4-1       | D2-1      | 18.34  | 23.60     | 0.40     | 18.34<br>(0.00) | 23.60<br>(0.00) |           |           | -0.0199<br>(0.1193) | 0.3395<br>(0.2209) | -0.0241<br>(0.2021) | -0.0573<br>(0.3857) | 100.0     | 18.34<br>(0.00)    | 23.60<br>(0.00)     |           |           | -0.0449<br>(0.0129) | -0.0102<br>(0.0130) | -0.0018<br>(0.0118) | 0.0172<br>(0.0052)  | 8.5  |
|      | <i>ad</i> |            |           |        |           |          |                 |                 |           |           |                     |                    |                     |                     |           |                    |                     |           |           |                     |                     |                     |                     |      |
| QTL2 |           | A5-1       | A5-2      | 26.14  | 95.80     | 0.44     | 26.14<br>(0.00) | 95.80<br>(0.00) |           |           | -0.0190<br>(0.1205) | 0.3736<br>(0.2299) | -0.0245<br>(0.2093) | -0.0605<br>(0.4003) | 99.9      | 26.14<br>(0.00)    | 95.80<br>(90.00)    |           |           | -0.0460<br>(0.0147) | -0.0097<br>(0.0103) | -0.0008<br>(0.0094) | 0.0167<br>(0.0053)  | 22.5 |
| QTL  | QTL Type  | True value |           |        |           |          | SCA             |                 |           |           |                     |                    | MPH                 |                     |           |                    |                     |           |           |                     |                     |                     |                     |      |
|      |           |            |           |        |           |          | Posi (cM)       | <i>a</i>        | <i>d</i>  | <i>aa</i> | <i>ad</i>           | <i>da</i>          | <i>dd</i>           | Power (%)           | Posi (cM) | <i>a</i>           | <i>d</i>            | <i>aa</i> | <i>ad</i> | <i>da</i>           | <i>dd</i>           | Power (%)           |                     |      |
|      |           | Marker     | Posi (cM) | Effect | Posi (cM) | <i>a</i> | <i>d</i>        | <i>aa</i>       | <i>ad</i> | <i>da</i> | <i>dd</i>           | Power (%)          | Posi (cM)           | <i>a</i>            | <i>d</i>  | <i>aa</i>          | <i>ad</i>           | <i>da</i> | <i>dd</i> | Power (%)           |                     |                     |                     |      |
| QTL1 |           |            |           |        |           |          |                 |                 |           |           |                     |                    |                     |                     | 18.34     | 4.1655<br>(0.9544) | -2.4131<br>(1.4016) |           |           |                     |                     |                     |                     | 6.9  |
|      | False QTL |            |           |        |           |          |                 |                 |           |           |                     |                    |                     |                     |           |                    |                     |           |           |                     |                     |                     |                     |      |
| QTL2 |           |            |           |        |           |          |                 |                 |           |           |                     |                    |                     |                     | 26.14     | 4.4357<br>(0.8507) | -2.6822<br>(1.5639) |           |           |                     |                     |                     |                     | 8.2  |
|      | <i>ad</i> |            |           |        |           |          |                 |                 |           |           |                     |                    |                     |                     |           |                    |                     |           |           |                     |                     |                     |                     |      |
| QTL1 |           | A4-1       | D2-1      | 18.34  | 23.60     | 0.40     | 18.34<br>(0.00) | 23.60<br>(0.00) |           |           | 0.2670<br>(0.1612)  | 0.1095<br>(0.0758) | 0.0912<br>(0.0746)  | -0.5172<br>(0.2113) | 66.5      | 18.34<br>(0.00)    | 23.60<br>(0.00)     |           |           | -0.5443<br>(2.4514) | 5.6387<br>(2.2560)  | -0.6636<br>(2.3172) | -3.5870<br>(3.4101) | 57.8 |
| QTL2 |           | A5-1       | A5-2      | 26.14  | 95.80     | 0.44     | 26.14<br>(0.00) | 95.80<br>(0.00) |           |           | 0.2897<br>(0.1681)  | 0.1175<br>(0.0749) | 0.0965<br>(0.0736)  | -0.5522<br>(0.2197) | 74.0      | 26.14<br>(0.00)    | 95.80<br>(0.00)     |           |           | -0.6112<br>(2.3727) | 5.9524<br>(2.3402)  | -0.5894<br>(2.4100) | -3.9025<br>(3.4834) | 60.6 |

**The software GAS\_NCII** (Genetic Analysis System for NC II mating design):

The Windows software in this study was attached (To first install JAVA Runtime Environment (jdk-7u71-windows-x64.exe) by default install directory, and to then install Matlab Runtime Environment (R2014b (8.4) For Windows). The two files are too large. Readers may download the first file at <http://www.oracle.com/technetwork/java/javase/downloads/jdk7-downloads-1880260.html> and the second file at <http://cn.mathworks.com/products/compiler/mcr/index.html>, respectively). If the readers want to use another jdk version please change your jdk directory in run.bat file. The above two files are also downloaded from <http://yun.baidu.com/share/link?shareid=2858238674&uk=3276116826>. EMS memory size in the running computer is more than 8 G. By running "run.dat" file, prior parameters  $a$  and  $b$  need to be determined by cross-validation experiments. Thus, our suggestion is to run the software several times and select the best results.



| Maternal        | Paternal       |                |                |                |                |                |     |     |                 |                 |
|-----------------|----------------|----------------|----------------|----------------|----------------|----------------|-----|-----|-----------------|-----------------|
|                 | F <sub>1</sub> | F <sub>2</sub> | F <sub>3</sub> | F <sub>4</sub> | F <sub>5</sub> | F <sub>6</sub> | ... | ... | F <sub>79</sub> | F <sub>80</sub> |
| M <sub>1</sub>  | *              |                |                |                |                |                |     |     |                 |                 |
| M <sub>2</sub>  |                | *              |                |                |                |                |     |     |                 |                 |
| M <sub>3</sub>  |                |                | *              |                |                |                |     |     |                 |                 |
| M <sub>4</sub>  |                |                |                | *              |                |                |     |     |                 |                 |
| M <sub>5</sub>  |                |                |                |                | *              |                |     |     |                 |                 |
| ...             |                |                |                |                |                | *              |     |     |                 |                 |
| ...             |                |                |                |                |                |                | ... |     |                 |                 |
| ...             |                |                |                |                |                |                |     | *   |                 |                 |
| M <sub>79</sub> |                |                |                |                |                |                |     |     | *               |                 |
| M <sub>80</sub> |                |                |                |                |                |                |     |     |                 | *               |

I

| Maternal        | Paternal       |                |                |                |                |                |     |     |                 |                 |
|-----------------|----------------|----------------|----------------|----------------|----------------|----------------|-----|-----|-----------------|-----------------|
|                 | F <sub>1</sub> | F <sub>2</sub> | F <sub>3</sub> | F <sub>4</sub> | F <sub>5</sub> | F <sub>6</sub> | ... | ... | F <sub>33</sub> | F <sub>34</sub> |
| M <sub>1</sub>  | *              | *              | *              | *              | *              |                |     |     |                 |                 |
| M <sub>2</sub>  |                | *              | *              | *              | *              | *              |     |     |                 |                 |
| M <sub>3</sub>  |                |                | *              | *              | *              | *              | *   |     |                 |                 |
| M <sub>4</sub>  |                |                |                | *              | *              | *              | *   | *   |                 |                 |
| M <sub>5</sub>  |                |                |                |                | *              | *              | *   | *   | *               |                 |
| ...             |                |                |                |                |                | *              | ... |     |                 |                 |
| ...             |                |                |                |                |                |                | ... |     |                 |                 |
| ...             |                |                |                |                |                |                | *   | *   | *               | *               |
| M <sub>33</sub> |                |                |                |                |                |                |     |     | ...             |                 |
| M <sub>34</sub> |                |                |                |                |                |                | *   | *   | *               | *               |

III

| Maternal        | Paternal       |                |                |                |                |                |     |     |                 |                 |
|-----------------|----------------|----------------|----------------|----------------|----------------|----------------|-----|-----|-----------------|-----------------|
|                 | F <sub>1</sub> | F <sub>2</sub> | F <sub>3</sub> | F <sub>4</sub> | F <sub>5</sub> | F <sub>6</sub> | ... | ... | F <sub>47</sub> | F <sub>48</sub> |
| M <sub>1</sub>  | *              | *              | *              |                |                |                |     |     |                 |                 |
| M <sub>2</sub>  |                | *              | *              | *              |                |                |     |     |                 |                 |
| M <sub>3</sub>  |                |                | *              | *              | *              |                |     |     |                 |                 |
| M <sub>4</sub>  |                |                |                | *              | *              | *              |     |     |                 |                 |
| M <sub>5</sub>  |                |                |                |                | *              | *              | *   |     |                 |                 |
| ...             |                |                |                |                |                | *              | ... |     |                 |                 |
| ...             |                |                |                |                |                |                | ... |     |                 |                 |
| ...             |                |                |                |                |                |                |     | *   | *               | *               |
| M <sub>47</sub> |                |                |                |                |                |                |     | *   | *               | *               |
| M <sub>48</sub> |                |                |                |                |                |                |     | *   | *               | *               |

II

| Maternal        | Paternal       |                |                |                |                |                |                |                |     |                 |
|-----------------|----------------|----------------|----------------|----------------|----------------|----------------|----------------|----------------|-----|-----------------|
|                 | F <sub>1</sub> | F <sub>2</sub> | F <sub>3</sub> | F <sub>4</sub> | F <sub>5</sub> | F <sub>6</sub> | F <sub>7</sub> | F <sub>8</sub> | ... | F <sub>15</sub> |
| M <sub>1</sub>  | *              | *              | *              | *              | *              | *              | *              | *              | *   | *               |
| M <sub>2</sub>  | *              | *              | *              | *              | *              | *              | *              | *              | *   | *               |
| M <sub>3</sub>  | *              | *              | *              | *              | *              | *              | *              | *              | *   | *               |
| M <sub>4</sub>  | *              | *              | *              | *              | *              | *              | *              | *              | *   | *               |
| M <sub>5</sub>  | *              | *              | *              | *              | *              | *              | *              | *              | *   | *               |
| M <sub>6</sub>  | *              | *              | *              | *              | *              | *              | *              | *              | *   | *               |
| M <sub>7</sub>  | *              | *              | *              | *              | *              | *              | *              | *              | *   | *               |
| M <sub>8</sub>  | *              | *              | *              | *              | *              | *              | *              | *              | *   | *               |
| ...             | *              | *              | *              | *              | *              | *              | *              | *              | *   | *               |
| M <sub>15</sub> | *              | *              | *              | *              | *              | *              | *              | *              | *   | *               |

IV

**Figure S1** | Mating strategies in NCII genetic mating design. In the NCII mating design, each maternal line was crossed with one (I), two, three (II), four, five (III), six, seven, and fifteen (IV) paternal lines.

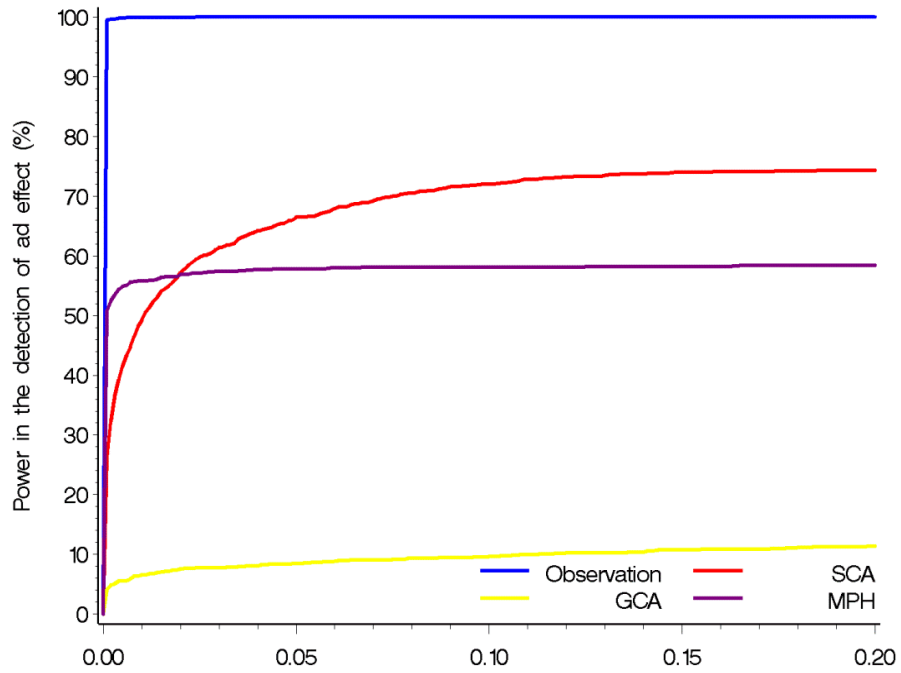

A

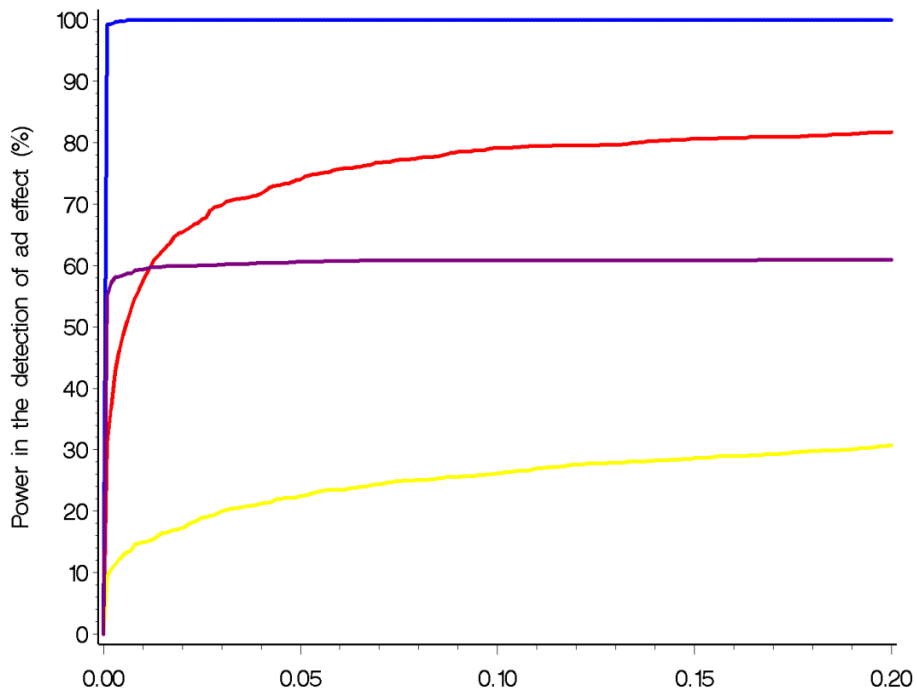

B

**Figure S2** | Statistical power in the detection of QTL1 (A) and QTL2 (B) under different false discovery rates for various phenotypic measures (trait phenotype(observation), GCA, SCA and MPH). The true and estimated values for simulated QTL are listed in Table S6.
